# Supplementary material for: Comprehensive nationwide incidence and prevalence trends of atrial fibrillation in Finland
Source: PubMed Central journal article supplement — Open Heart. 2022 Nov 22;9(2):e002140. doi: 10.1136/openhrt-2022-002140 (PMC9685262; doi:10.1136/openhrt-2022-002140), 2022-11-22
Supplement: openhrt-2022-002140supp001.pdf [file openhrt-2022-002140supp001.pdf]

1 **Comprehensive nationwide incidence and prevalence trends of atrial**  
2 **fibrillation in Finland – Supplementary data**

3

4 **Supplementary Figure 1.** The incidence of atrial fibrillation in relation to age.

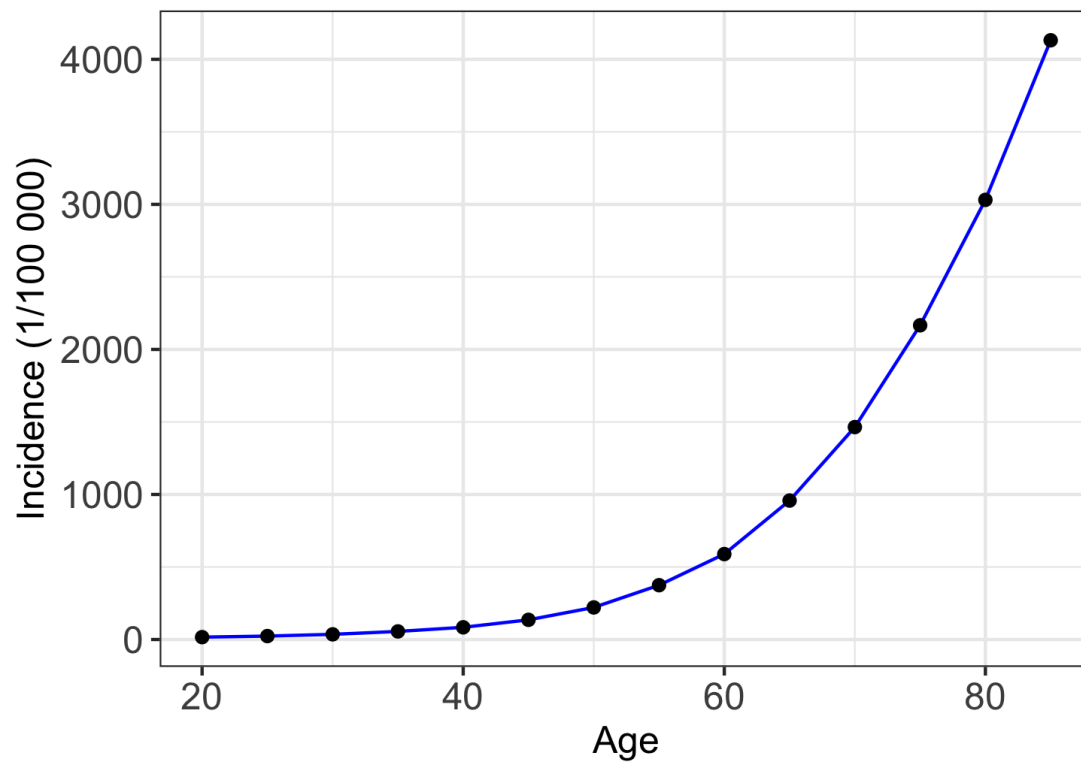

5

6

- 1 **Supplementary Figure 2.** Raw incidence rates of new-onset atrial fibrillation during 2007-2018
- 2 comparing the selected age-groups.

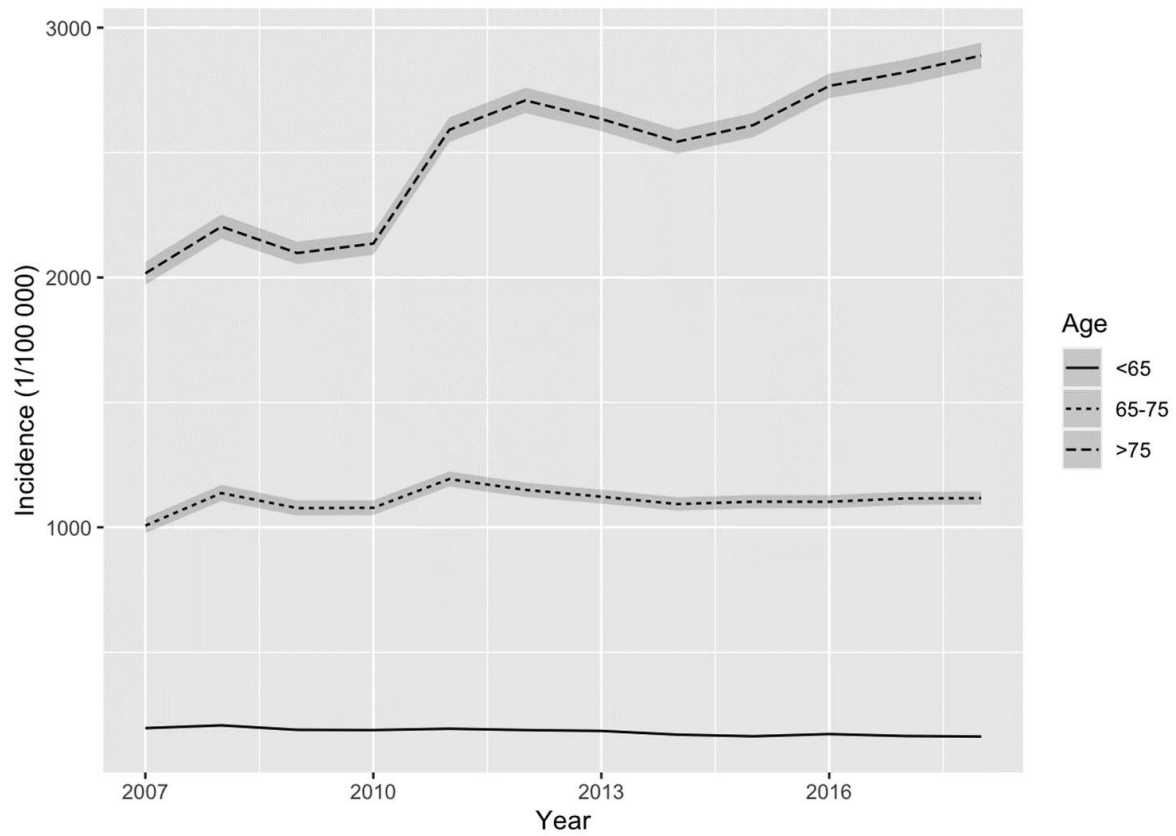

3

4

- 1 **Supplementary Figure 3.** Time trends in the prevalence (%) of atrial fibrillation in Finland in
- 2 the adults ( $\geq 20$  years) 2007-2018.

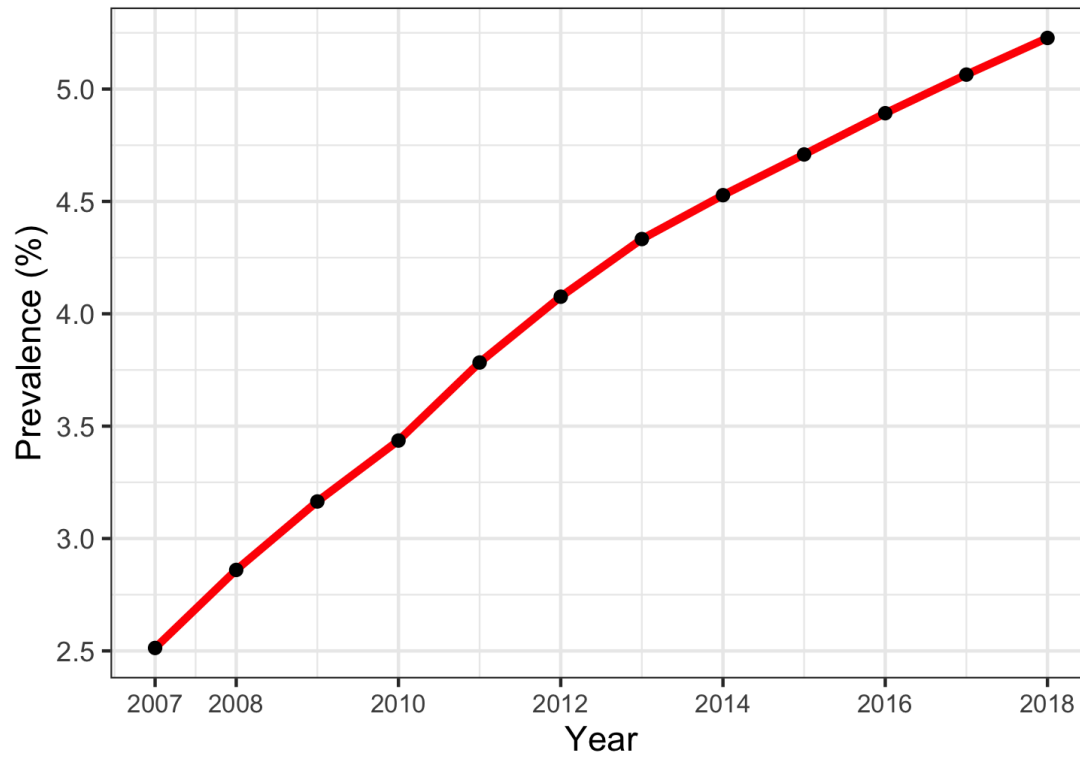

3

4

1 **Supplementary Figure 4.** Prevalence (%) of atrial fibrillation in relation to age.

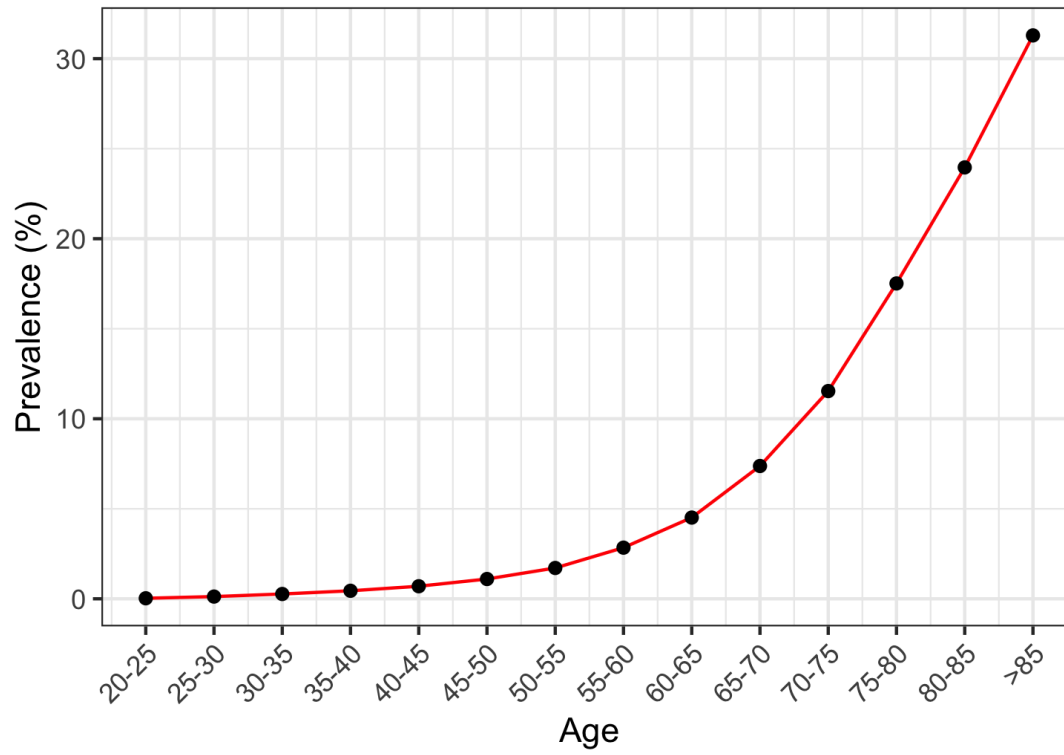

2

3

4

1 **Supplementary Table 1.** Registers used in the study.

| Register                                                            | Registry                                           | Information obtained                                                   |
|---------------------------------------------------------------------|----------------------------------------------------|------------------------------------------------------------------------|
| Finnish Care Register for Health Care (Hospital / HILMO)            | Finnish Institute for Health and Welfare           | Diagnoses (ICD-10) and interventions (NCSP) with codes                 |
| Finnish Care Register, (Primary / AvoHILMO)                         | Finnish Institute for Health and Welfare           | Diagnoses (ICD-10, ICPC-2) and interventions (NCSP) with codes         |
| National Prescription Register                                      | The Social Insurance Institution of Finland (KELA) | Drug purchases (date, ATC codes, amount)                               |
| National Reimbursement Register                                     | The Social Insurance Institution of Finland (KELA) | Reimbursements for drug purchases and for private health care expenses |
| National Causes of Death Register                                   | Statistics Finland                                 | Death dates and causes of deaths.                                      |
| National Cancer Registry                                            | Finnish Cancer Registry                            | ICD-O-3 codes, date of diagnosis and other information.                |
| Laboratory databases                                                | Six largest central laboratories in Finland        | INR and other relevant laboratory measurements                         |
| Population Register                                                 | Population Register Center                         | Places of domicile                                                     |
| Finnish Care Register for Health Care (Social care / SosiaaliHILMO) | Finnish Institute for Health and Welfare           | Non-hospital institutionalizations                                     |
| Tax Register                                                        | Tax Administration                                 | Income and taxes                                                       |
| The Register of Completed Education and Degrees                     | Statistics Finland                                 | Education and socio-economic status                                    |

2 ICD-10: International Classification of Diseases 10th Revision; NCSP, Nordic Classification of Surgical  
3 Procedures; ICPC-2, International Classification of Primary Care 2nd Revision. HILMO: hospitalisations  
4 and outpatient specialist visits; AvoHILMO: primary health care; KELA: National Reimbursement  
5 Register maintained by the Social Insurance Institute.

6

7

1 **Supplementary Table 2.** Prevalence of atrial fibrillation by year in adults ( $\geq 20$  years)

2

| Year | Men/N  | Men /<br>Population | Women/N | Women/<br>Population | Men   | Women |
|------|--------|---------------------|---------|----------------------|-------|-------|
| 2007 | 53753  | 1776286             | 48644   | 1906896              | 3.0 % | 2.6 % |
| 2008 | 62030  | 1792064             | 55338   | 1919008              | 3.5 % | 2.9 % |
| 2009 | 69280  | 1939698             | 61448   | 2067023              | 3.6 % | 3.0 % |
| 2010 | 76174  | 1961541             | 66699   | 2086279              | 3.9 % | 3.2 % |
| 2011 | 84828  | 1983883             | 73609   | 2106387              | 4.3 % | 3.5 % |
| 2012 | 92426  | 2000278             | 79524   | 2119800              | 4.6 % | 3.8 % |
| 2013 | 99242  | 2047087             | 84782   | 2163876              | 4.8 % | 3.9 % |
| 2014 | 104636 | 2061003             | 88877   | 2175529              | 5.1 % | 4.1 % |
| 2015 | 109673 | 2073317             | 92640   | 2184539              | 5.3 % | 4.2 % |
| 2016 | 114765 | 2085907             | 96450   | 2192122              | 5.5 % | 4.4 % |
| 2017 | 119408 | 2095614             | 100052  | 2198408              | 5.7 % | 4.6 % |
| 2018 | 123969 | 2103590             | 103261  | 2203137              | 5.9 % | 4.7 % |

3 Population = background population

4
